# Supplementary material
Source: PubMed Central journal article supplement (PMC6439619)
Supplement: jamacardiol-4-174-s001.pdf [file jamacardiol-4-174-s001.pdf]

## Supplementary Online Content

DeFina LF, Radford NB, Barlow CE, et al. Association of all-cause and cardiovascular mortality with high levels of physical activity and concurrent coronary artery calcification. *JAMA Cardiol*. Published online January 30, 2019. doi:10.1001/jamacardio.2018.4628

**eTable 1.** Baseline Characteristics of 9501 Generally Healthy Women by Physical Activity Level and Coronary Artery Calcification Categories

**eFigure 1.** Relative Risk of Prevalent Coronary Artery Calcification ( $\geq 100$  Agatston Units) by Physical Activity Category in 9501 Generally Healthy Women

**eTable 2.** Total Number of All-Cause and Cardiovascular Disease Mortality in 9501 Generally Healthy Women by Physical Activity Category and Coronary Artery Calcification Category

**eTable 3.** Mean Physical Activity Reported by 9501 Generally Healthy Women by Physical Activity Category and Coronary Artery Calcification Category

**eTable 4.** Mean Physical Activity Reported by 21 758 Generally Healthy Men by Physical Activity Category and Coronary Artery Calcification Category

**eTable 5.** Hazard Ratio for All-Cause and Cardiovascular Disease Mortality in 21 758 Generally Healthy Men by Coronary Artery Calcification (0 vs  $\geq 1$  AU) and Physical Activity Category

**eTable 6.** Hazard Ratio for All-Cause and Cardiovascular Disease Mortality in 21 758 Generally Healthy Men by Coronary Artery Calcification ( $< 400$  vs  $\geq 400$  AU) and Physical Activity Category

**eTable 7.** Hazard Ratio for All-Cause and Cardiovascular Disease Mortality in 20 239 Generally Healthy Men by Coronary Artery Calcification ( $< 100$  vs  $\geq 100$  AU) and Physical Activity Category With Reported Medication Use to Allow Adjustment for Statin Use (n=3770)

This supplementary material has been provided by the authors to give readers additional information about their work.



**eTable 1.** Baseline Characteristics of 9501 Generally Healthy Women by Physical Activity Level and Coronary Artery Calcification Categories

| Coronary Artery Calcification Category         | <100 AU*                   |                                  |                                      |                                | ≥100 AU       |                                |                                   |                               | Total (n=9,501) |
|------------------------------------------------|----------------------------|----------------------------------|--------------------------------------|--------------------------------|---------------|--------------------------------|-----------------------------------|-------------------------------|-----------------|
|                                                | Physical Activity Category | <1500 MET-minutes/week (n=6,727) | 1500-2999 MET-minutes/week (n=1,513) | ≥3000 MET-minutes/week (n=560) | p for trend   | <1500 MET-minutes/week (n=588) | 1500-2999 MET-minutes/week (n=80) | ≥3000 MET-minutes/week (n=33) |                 |
| Age, mean (SD), y                              | 52.3 (8.0)                 | 50.6 (7.3)                       | 50.6 (7.3)                           | <.001                          | 62.5 (8.7)    | 62.3 (8.8)                     | 60.5 (9.5)                        | 0.416                         | 52.7 (8.4)      |
| White, No. (%)                                 | 6114 (90.9)                | 1405 (92.9)                      | 517 (92.3)                           | 0.203                          | 536 (91.2)    | 76 (95.0)                      | 32 (97.0)                         | 0.620                         | 8680 (91.4)     |
| Current smoker, No. (%)                        | 373 (5.5)                  | 51 (3.4)                         | 20 (3.6)                             | <.001                          | 41 (7.0)      | 4 (5.0)                        | 3 (9.1)                           | 0.737                         | 492 (5.2)       |
| Statin use, No. (%)                            | 513 (8.2)                  | 82 (5.7)                         | 30 (5.7)                             | <.001                          | 152 (27.6)    | 18 (22.8)                      | 8 (24.2)                          | 0.345                         | 803 (9.0)       |
| Body mass index, mean (SD), kg/m <sup>2</sup>  | 25.6 (5.2)                 | 24.0 (4.0)                       | 23.8 (3.8)                           | <.001                          | 26.6 (5.5)    | 25.3 (4.5)                     | 24.0 (3.8)                        | 0.002                         | 25.3 (5.0)      |
| Systolic blood pressure, mean (SD), mmHg       | 118.0 (16.1)               | 115.4 (14.7)                     | 116.4 (16.0)                         | <.001                          | 130.2 (19.1)  | 126.6 (17.8)                   | 125.4 (16.7)                      | 0.045                         | 118.3(16.4)     |
| Glucose, mean (SD), mg/dL                      | 94.1 (14.8)                | 92.3 (10.2)                      | 92.6 (12.2)                          | <.001                          | 101.0 (25.0)  | 96.1 (15.9)                    | 93.0 (11.5)                       | 0.006                         | 94.2 (15.0)     |
| Cholesterol, mean (SD), mg/dL                  | 204.3 (35.8)               | 198.3 (33.8)                     | 201.2 (36.1)                         | <.001                          | 212.6 (39.5)  | 215.3 (38.7)                   | 206.2 (22.7)                      | 0.855                         | 203.8 (35.9)    |
| LDL cholesterol, mean (SD), mg/dL              | 116.5 (31.9)               | 110.1 (30.0)                     | 110.8 (31.6)                         | <.001                          | 122.6 (35.8)  | 125.5 (35.8)                   | 112.7 (20.1)                      | 0.512                         | 115.6 (32.0)    |
| HDL cholesterol, mean (SD), mg/dL              | 66.2 (17.3)                | 70.3 (17.2)                      | 72.2 (17.9)                          | <.001                          | 64.4 (19.4)   | 68.8 (17.7)                    | 74.5 (12.4)                       | <.001                         | 67.2 (17.6)     |
| Triglycerides, mean (SD), mg/dL                | 108.1 (67.5)               | 89.7 (50.4)                      | 94.2 (97.7)                          | <.001                          | 129.0 (79.3)  | 104.5 (50.5)                   | 94.8 (41.8)                       | <.001                         | 105.6 (68.5)    |
| Calcium, mean (SD), mg/dL                      | 9.2 (0.4)                  | 9.2 (0.4)                        | 9.2 (0.4)                            | 0.110                          | 9.3 (0.4)     | 9.4 (0.4)                      | 9.3 (0.4)                         | 0.371                         | 9.2 (0.4)       |
| Framingham Risk Score, mean (SD), %            | 4.5 (3.1)                  | 3.6 (2.6)                        | 3.6 (2.8)                            | <.001                          | 7.2 (4.2)     | 5.9 (2.9)                      | 5.1 (2.4)                         | <.001                         | 4.5 (3.2)       |
|                                                |                            |                                  |                                      |                                |               |                                |                                   |                               |                 |
| Physical activity, mean (SD), MET-minutes/week | 461.5 (462.1)              | 2083.8 (420.3)                   | 4504.8 (1946.8)                      | <.001                          | 365.6 (444.5) | 2044.3 (412.6)                 | 4589.8 (1263.5)                   | <.001                         | 979.9 (1271.3)  |
| Physical activity, mean (SD), minutes/week     | 119.7 (126.6)              | 386.7 (131.1)                    | 724.5 (330.8)                        | <.001                          | 94.2 (114.0)  | 394.7 (123.5)                  | 766.1 (234.6)                     | <.001                         | 200.8 (223.8)   |
| Physical activity lifetime, mean (SD), y       | 15.1 (12.6)                | 19.7 (12.4)                      | 23.0 (13.0)                          | <.001                          | 15.8 (14.6)   | 26.3 (16.7)                    | 27.9 (16.6)                       | <.001                         | 17.0 (13.1)     |
|                                                |                            |                                  |                                      |                                |               |                                |                                   |                               |                 |
| CAC score, mean (SD), AU                       | 4.6 (14.9)                 | 3.2 (11.8)                       | 4.5 (15.2)                           | 0.014                          | 442.4 (518.2) | 375.3 (335.2)                  | 315.4 (374.0)                     | 0.065                         | 35.6 (174.9)    |
| Calcification volume, mean (SD)                | 4.4 (12.1)                 | 3.4 (10.1)                       | 4.3 (12.6)                           | 0.071                          | 267.4 (306.3) | 230.2 (205.2)                  | 205.6 (269.6)                     | 0.093                         | 27.5 (115.9)    |

| Coronary Artery Calcification Category     | <100 AU*                         |                                      |                                |             | ≥100 AU                        |                                   |                               |             |                 |
|--------------------------------------------|----------------------------------|--------------------------------------|--------------------------------|-------------|--------------------------------|-----------------------------------|-------------------------------|-------------|-----------------|
| Physical Activity Category                 | <1500 MET-minutes/week (n=6,727) | 1500-2999 MET-minutes/week (n=1,513) | ≥3000 MET-minutes/week (n=560) | p for trend | <1500 MET-minutes/week (n=588) | 1500-2999 MET-minutes/week (n=80) | ≥3000 MET-minutes/week (n=33) | p for trend | Total (n=9,501) |
| Number of calcification lesions, mean (SD) | 0.4 (1.0)                        | 0.3 (0.9)                            | 0.3 (1.1)                      | 0.077       | 7.7 (7.3)                      | 6.4 (5.6)                         | 6.1 (7.4)                     | 0.022       | 1.0 (3.0)       |
| Cardiorespiratory fitness, mean (SD), METs | 9.0 (1.7)                        | 10.3 (1.8)                           | 10.7 (1.9)                     | <.001       | 8.1 (1.6)                      | 9.0 (1.6)                         | 9.7 (1.9)                     | <.001       | 9.3 (1.8)       |
| VO <sub>2</sub> max, mean (SD), ml/kg/min  | 31.4 (5.9)                       | 36.2 (6.2)                           | 37.5 (6.7)                     | <.001       | 28.2 (5.6)                     | 31.7 (5.5)                        | 34.1 (6.8)                    | <.001       | 32.4 (6.5)      |
| ≥50 ml/kg/min, No. (%)                     | 7 (0.1)                          | 11 (0.8)                             | 18 (3.8)                       | <.001       | 0 (0.0)                        | 0 (0.0)                           | 1 (3.7)                       | 0.020       | 37 (0.5)        |
| Maximum heart rate, mean (SD), bpm         | 171.2 (13.4)                     | 173.5 (12.1)                         | 172.2 (12.2)                   | <.001       | 160.3 (14.4)                   | 162.3 (12.3)                      | 164.5 (17.9)                  | 0.107       | 171.1 (13.4)    |
| Heart rate recovery@1min, mean (SD), bpm   | 22.9 (8.1)                       | 25.5 (8.2)                           | 26.3 (8.4)                     | <.001       | 20.0 (8.1)                     | 20.9 (8.3)                        | 25.6 (9.7)                    | 0.008       | 23.4 (8.3)      |

Abbreviations: AU, Agatston units; BMI, body mass index; LDL, low density lipoprotein; HDL, high density lipoprotein; MET, metabolic equivalent of task; BPM, beats per minutes  
SI conversion factors: To convert cholesterol to millimoles per liter, multiply by 0.0259; to convert triglycerides to millimoles per liter, multiply by 0.0113.  
Sample sizes were reduced where a specific observation was missing with resulting minimum sample sizes for statin use (n=8,873), LDL cholesterol (n=9,477), calcium (n=6,691), physical activity lifetime (n=5,653), calcification volume (n=7,702), number of calcification lesions (n=7,733), and cardiorespiratory fitness (n=7,614)

**eFigure 1.** Relative Risk of Prevalent Coronary Artery Calcification ( $\geq 100$  Agatston Units) by Physical Activity Category in 9501 Generally Healthy Women

Model was adjusted for age, BMI, glucose, cholesterol, systolic blood pressure, and smoking status. The error bars represent the 95% confidence intervals. Abbreviation: MET, metabolic equivalent of task

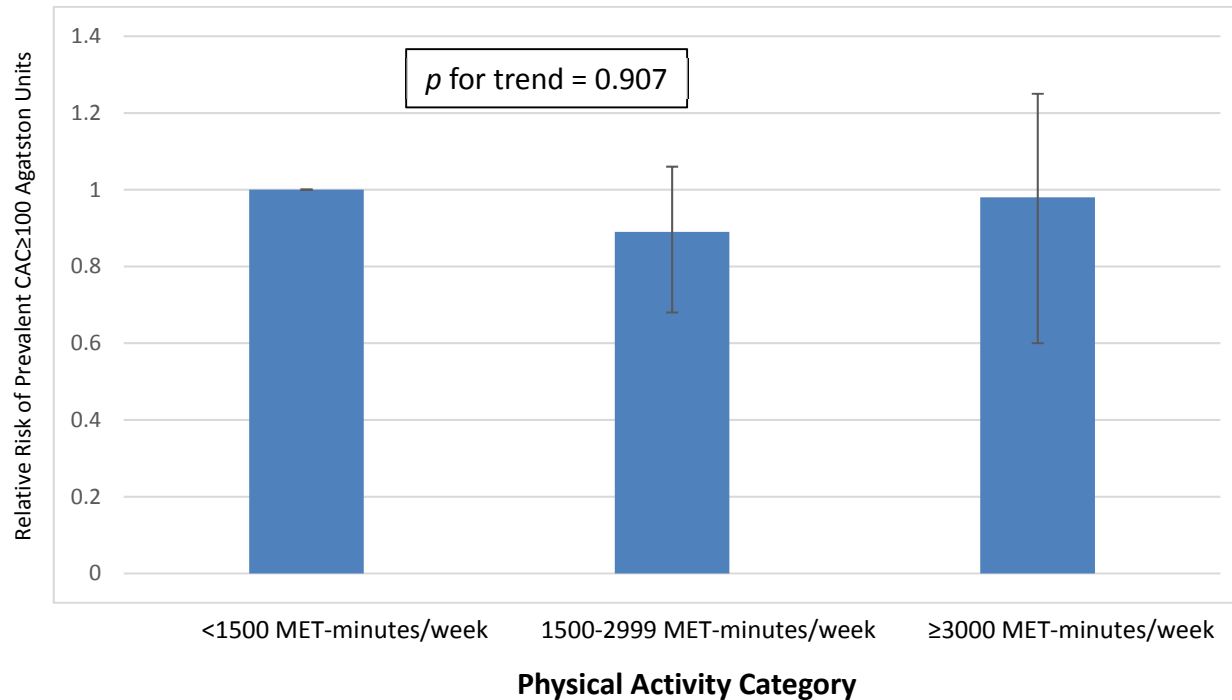

**eTable 2.** Total Number of All-Cause and Cardiovascular Disease Mortality in 9501 Generally Healthy Women by Physical Activity Category and Coronary Artery Calcification Category

| Coronary Artery Calcification Category               | <100 AU  |           |          | ≥100 AU |           |          | Total    |
|------------------------------------------------------|----------|-----------|----------|---------|-----------|----------|----------|
|                                                      | <1500    | 1500-2999 | ≥3000    | <1500   | 1500-2999 | ≥3000    |          |
| <b>Physical Activity Category (MET-minutes/week)</b> |          |           |          |         |           |          |          |
| <b>Total participants</b>                            | 6,727    | 1,513     | 560      | 588     | 80        | 33       | 9,501    |
| <b>Average follow-up (years)</b>                     | 10.1     | 9.6       | 9.8      | 10.3    | 10.3      | 10.2     | 10.0     |
| <b>Total follow-up (years)</b>                       | 68,005.5 | 14,487.2  | 5,470.5  | 6,047.4 | 822.3     | 335.3    | 95,168.2 |
| <b>All-cause deaths</b>                              | 126      | 16        | <b>2</b> | 55      | 8         | <b>3</b> | 210      |
| <b>Incidence (per 1000 person-years)</b>             | 1.9      | 1.1       | 0.4      | 9.1     | 9.7       | 8.9      | 2.2      |
| <b>Cardiovascular disease deaths</b>                 | 19       | 3         | <b>1</b> | 17      | 2         | <b>2</b> | 44       |
| <b>Incidence (per 1000 person-years)</b>             | 0.3      | 0.2       | 0.2      | 2.8     | 2.4       | 6.0      | 0.5      |

Abbreviation: AU, Agatston units; MET, metabolic equivalent of task

**eTable 3.** Mean Physical Activity Reported by 9501 Generally Healthy Women by Physical Activity Category and Coronary Artery Calcification Category

|                             |       | CAC AU                                           |        |        | CAC AU                                           |        |        |
|-----------------------------|-------|--------------------------------------------------|--------|--------|--------------------------------------------------|--------|--------|
|                             |       | < 100                                            |        |        | ≥100                                             |        |        |
|                             |       | Physical activity category<br>(MET-minutes/week) |        |        | Physical activity category<br>(MET-minutes/week) |        |        |
| All                         | <1500 | 1500-<3000                                       | ≥3000  | <1500  | 1500-<3000                                       | ≥3000  |        |
| <b>Running</b>              | 118.6 | 40.3                                             | 298.0  | 633.3  | 20.2                                             | 170.5  | 742.7  |
| <b>Walking</b>              | 281.2 | 200.9                                            | 527.0  | 604.2  | 179.7                                            | 689.2  | 716.7  |
| <b>Bicycling</b>            | 114.5 | 42.7                                             | 265.0  | 608.8  | 42.3                                             | 212.1  | 513.6  |
| <b>Racquet Sports</b>       | 108.1 | 13.3                                             | 197.8  | 1076.3 | 7.8                                              | 105.0  | 686.5  |
| <b>Elliptical/Stairs</b>    | 39.8  | 20.8                                             | 99.3   | 133.5  | 10.6                                             | 45.5   | 87.3   |
| <b>Swimming</b>             | 32.9  | 10.8                                             | 71.7   | 189.8  | 2.6                                              | 181.4  | 272.0  |
| <b>Aerobics/Dance</b>       | 81.9  | 41.5                                             | 215.2  | 247.1  | 27.3                                             | 153.0  | 222.7  |
| <b>Cross-Country Skiing</b> | 3.3   | 2.0                                              | 3.8    | 16.1   | 0.3                                              | 10.1   | 65.5   |
| <b>Other Sports</b>         | 27.1  | 4.8                                              | 54.4   | 237.5  | 1.6                                              | 58.1   | 120.9  |
| <b>Other</b>                | 88.2  | 17.8                                             | 208.6  | 608.1  | 15.4                                             | 248.0  | 1026.6 |
| <b>All</b>                  | 979.9 | 461.5                                            | 2083.8 | 4504.8 | 365.6                                            | 2044.3 | 4589.8 |

**eTable 4.** Mean Physical Activity Reported by 21 758 Generally Healthy Men by Physical Activity Category and Coronary Artery Calcification Category

|                             |        | CAC AU                                             |                |        | CAC AU                                             |                |        |
|-----------------------------|--------|----------------------------------------------------|----------------|--------|----------------------------------------------------|----------------|--------|
|                             |        | < 100                                              |                |        | ≥100                                               |                |        |
|                             |        | Physical activity categories<br>(MET·minutes/week) |                |        | Physical activity categories<br>(MET·minutes/week) |                |        |
|                             | All    | <1500                                              | 1500-<br><3000 | ≥3000  | <1500                                              | 1500-<br><3000 | ≥3000  |
| <b>Running</b>              | 246.3  | 126.8                                              | 589.0          | 910.0  | 84.6                                               | 487.1          | 683.3  |
| <b>Walking</b>              | 187.0  | 125.9                                              | 276.9          | 446.1  | 149.8                                              | 394.7          | 599.1  |
| <b>Bicycling</b>            | 183.4  | 67.0                                               | 367.2          | 1037.1 | 67.8                                               | 319.5          | 876.2  |
| <b>Racquet Sports</b>       | 107.5  | 27.2                                               | 225.6          | 727.9  | 17.2                                               | 204.2          | 656.2  |
| <b>Elliptical/Stairs</b>    | 47.0   | 30.3                                               | 95.9           | 118.7  | 22.6                                               | 112.4          | 112.0  |
| <b>Swimming</b>             | 35.6   | 12.6                                               | 74.6           | 189.4  | 11.0                                               | 79.3           | 177.7  |
| <b>Aerobics/Dance</b>       | 9.4    | 5.0                                                | 19.9           | 27.0   | 4.7                                                | 20.9           | 40.6   |
| <b>Cross-Country Skiing</b> | 3.9    | 2.6                                                | 8.8            | 5.8    | 2.6                                                | 9.7            | 5.6    |
| <b>Other Sports</b>         | 57.4   | 17.8                                               | 111.1          | 392.1  | 9.1                                                | 84.6           | 356.8  |
| <b>Other</b>                | 112.9  | 19.0                                               | 251.6          | 705.6  | 6.0                                                | 275.4          | 1012.7 |
| <b>All</b>                  | 1040.6 | 473.8                                              | 2077.9         | 4618.2 | 430.7                                              | 2087.1         | 4646.9 |



**eTable 5.** Hazard Ratio for All-Cause and Cardiovascular Disease Mortality in 21 758 Generally Healthy Men by Coronary Artery Calcification (0 vs  $\geq 1$  AU) and Physical Activity Category<sup>a</sup>

| Physical Activity Category              | Coronary Artery Calcification |                   |
|-----------------------------------------|-------------------------------|-------------------|
|                                         | 0 AU                          | $\geq 1$ AU       |
| <b>All-Cause Mortality</b>              |                               |                   |
| <1500 MET-minutes – Referent            | 1                             | 1                 |
| 1500-2999 MET-minutes                   | 0.73 (0.45, 1.20)             | 0.85 (0.67, 1.08) |
| $\geq 3000$ MET-minutes                 | 0.84 (0.44, 1.63)             | 0.63 (0.44, 0.92) |
| <b>Cardiovascular Disease Mortality</b> |                               |                   |
| <1500 MET-minutes – Referent            | 1                             | 1                 |
| 1500-2999 MET-minutes                   | 1.13 (0.41, 3.12)             | 0.57 (0.32, 1.01) |
| $\geq 3000$ MET-minutes                 | 0.84 (0.17, 4.23)             | 0.65 (0.32, 1.33) |

<sup>a</sup>Adjusted for age, BMI, glucose, cholesterol, systolic blood pressure, smoker

Abbreviations: AU, Agatston units; MET, metabolic equivalent of task; MET-min, MET-minutes per week

**eTable 6.** Hazard Ratio for All-Cause and Cardiovascular Disease Mortality in 21 758 Generally Healthy Men by Coronary Artery Calcification (<400 vs  $\geq 400$  AU) and Physical Activity Category<sup>a</sup>

| Physical Activity Category              | Coronary Artery Calcification |                   |
|-----------------------------------------|-------------------------------|-------------------|
|                                         | <400 AU                       | $\geq 400$ AU     |
| <b>All-Cause Mortality</b>              |                               |                   |
| <1500 MET-minutes – Referent            | 1                             | 1                 |
| 1500-2999 MET-minutes                   | 0.82 (0.62, 1.08)             | 0.83 (0.58, 1.19) |
| $\geq 3000$ MET-minutes                 | 0.69 (0.46, 1.05)             | 0.65 (0.39, 1.08) |
| <b>Cardiovascular Disease Mortality</b> |                               |                   |
| <1500 MET-minutes – Referent            | 1                             | 1                 |
| 1500-2999 MET-minutes                   | 0.70 (0.36, 1.38)             | 0.61 (0.30, 1.26) |
| $\geq 3000$ MET-minutes                 | 0.44 (0.13, 1.43)             | 0.88 (0.41, 1.90) |

<sup>a</sup>Adjusted for age, BMI, glucose, cholesterol, systolic blood pressure, smoker

Abbreviations: AU, Agatston units; MET, metabolic equivalent of task;

**eTable 7.** Hazard Ratio for All-Cause and Cardiovascular Disease Mortality in 20 239 Generally Healthy Men by Coronary Artery Calcification (<100 vs ≥100 AU) and Physical Activity Category With Reported Medication Use to Allow Adjustment for Statin Use (n=3770)

| Physical Activity Category              | Coronary Artery Calcification |                   |                   |                   |
|-----------------------------------------|-------------------------------|-------------------|-------------------|-------------------|
|                                         | <100 AU                       |                   | ≥100 AU           |                   |
|                                         | Age-adjusted                  | Fully adjusted*   | Age-adjusted      | Fully adjusted*   |
| <b>All-cause mortality</b>              |                               |                   |                   |                   |
| <1500 MET-minutes – Referent            | 1                             | 1                 | 1                 | 1                 |
| 1500-2999 MET-minutes                   | 0.75 (0.54, 1.04)             | 0.79 (0.57, 1.10) | 0.80 (0.60, 1.09) | 0.84 (0.62, 1.14) |
| ≥3000 MET-minutes                       | 0.49 (0.28, 0.88)             | 0.45 (0.24, 0.83) | 0.77 (0.52, 1.16) | 0.82 (0.56, 1.22) |
| <b>Cardiovascular Disease Mortality</b> |                               |                   |                   |                   |
| <1500 MET-minutes – Referent            | 1                             | 1                 | 1                 | 1                 |
| 1500-2999 MET-minutes                   | 0.73 (0.33, 1.61)             | 0.80 (0.36, 1.75) | 0.63 (0.34, 1.17) | 0.69 (0.37, 1.29) |
| ≥3000 MET-minutes                       | 0.47 (0.11, 1.92)             | 0.42 (0.09, 1.93) | 0.83 (0.40, 1.71) | 0.89 (0.43, 1.83) |

<sup>a</sup>Adjusted for age, BMI, glucose (+), cholesterol, systolic blood pressure (+), smoker (+), statin use (+)

Abbreviations: AU, Agatston units; MET, metabolic equivalent of task
